# Supplementary material
Source: PubMed Central journal article supplement (PMC4156885)
Supplement: NIHMS606675-supplement-01.pdf [file NIHMS606675-supplement-01.pdf]

**Supplemental Table 1: Study Power Under Different Assumptions of Treatment Efficacy**

| Group             | Transient AKI | Mild AKI | Moderate AKI | Severe AKI | Dialysis | Death | Power |
|-------------------|---------------|----------|--------------|------------|----------|-------|-------|
| Usual Care        | 0.5           | 0.15     | 0.10         | 0.10       | 0.05     | 0.10  | n/a   |
| Clinical Efficacy | 0.56          | 0.21     | 0.05         | 0.05       | 0.04     | 0.09  | 0.97  |
| Alternative 1     | 0.55          | 0.20     | 0.06         | 0.06       | 0.04     | 0.09  | 0.95  |
| Alternative 2     | 0.55          | 0.17     | 0.10         | 0.05       | 0.04     | 0.09  | 89%   |
| Alternative 3     | 0.55          | 0.20     | 0.05         | 0.05       | 0.05     | 0.10  | 87%   |
| Alternative 4     | 0.55          | 0.10     | 0.10         | 0.10       | 0.05     | 0.10  | 39%   |
| Alternative 5     | 0.54          | 0.13     | 0.09         | 0.09       | 0.05     | 0.10  | 31%   |
